# Supplementary material for: Coupling Ti-doping and oxygen vacancies in hematite nanostructures for solar water oxidation with high efficiency
Source: Royal Society of Chemistry journal article supplement (doi:10.1039/c3ta14575a), 2013-11-29
Supplement: c3ta14575a.pdf [file c3ta14575a.pdf]

# Supporting information

## **Coupling Ti-doping and Oxygen Vacancy in Hematite Nanostructures for Solar Water Oxidation with High Efficiency**

*Aiwu Pu, Jiujun Deng, Ming Li, Jing Gao, Hui Zhang, Yuanyuan Hao,*

*Jun Zhong\* and Xuhui Sun\**

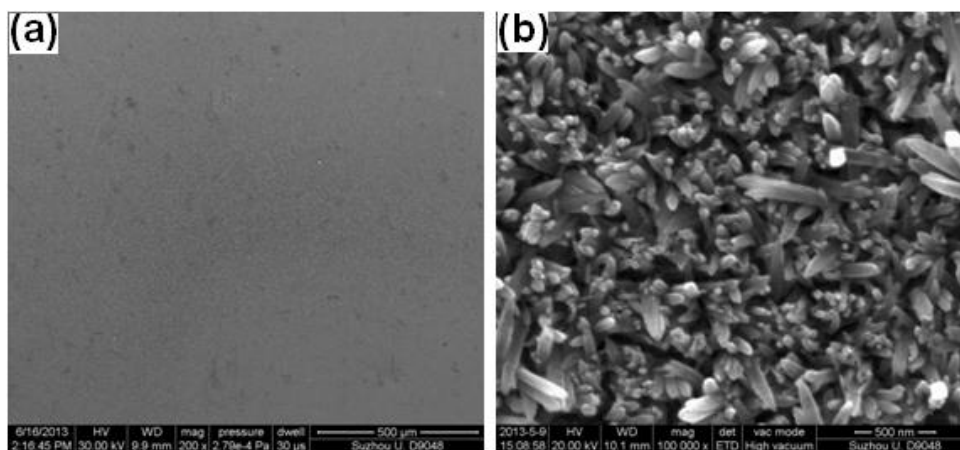

**Figure S1:** (a) and (b): SEM images of undoped hematite nanostructures sintered in a partial oxygen pressure of  $2.1 \times 10^{-2}$  Torr.

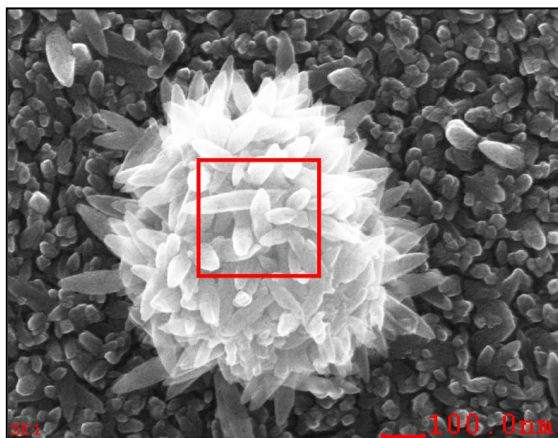

| <i>Element</i> | <i>Wt%</i> | <i>At%</i> |
|----------------|------------|------------|
| <i>OK</i>      | 35.54      | 65.70      |
| <i>TiK</i>     | 01.83      | 01.13      |
| <i>FeK</i>     | 62.62      | 33.16      |
| <i>Matrix</i>  | Correction | ZAF        |

**Figure S2:** SEM image (left) and elemental analysis of the coral-like nanostructures (right).

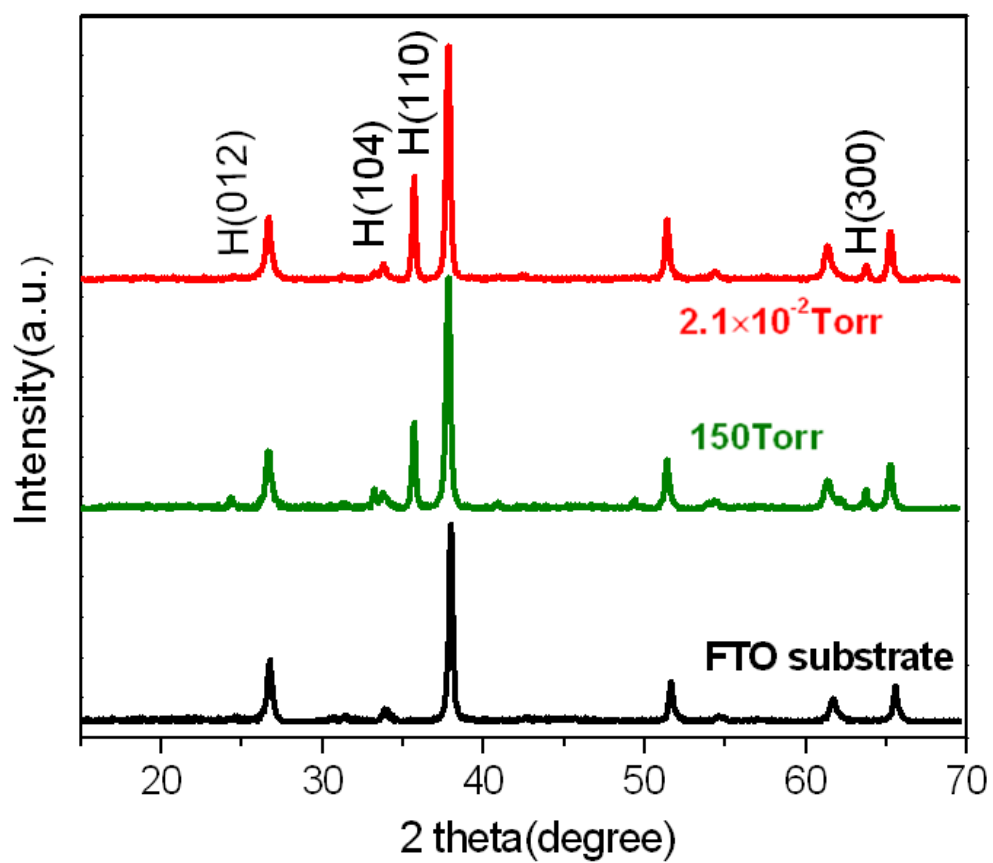

**Figure S3:** XRD spectra of undoped hematite nanostructures sintered in various partial oxygen pressures.

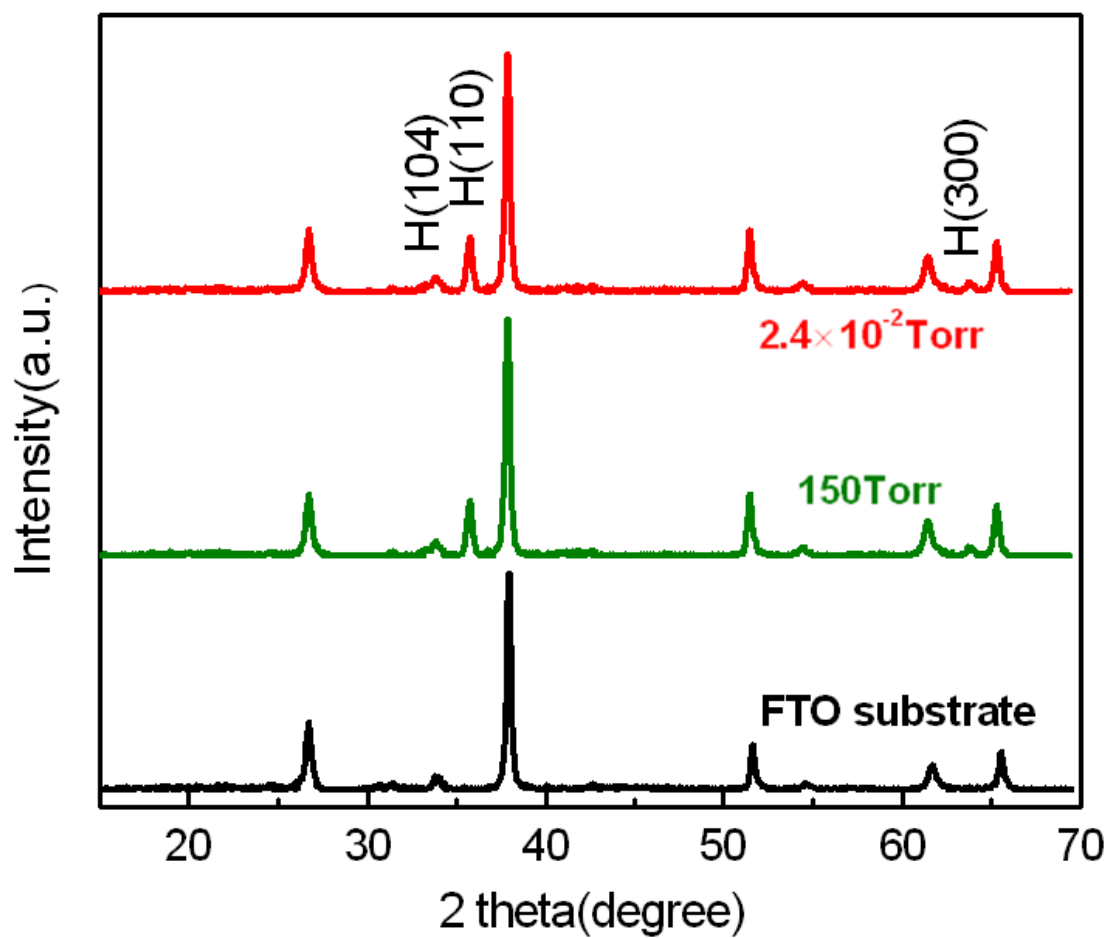

**Figure S4:** XRD spectra of Ti-doped hematite nanostructures sintered in various partial oxygen pressures.

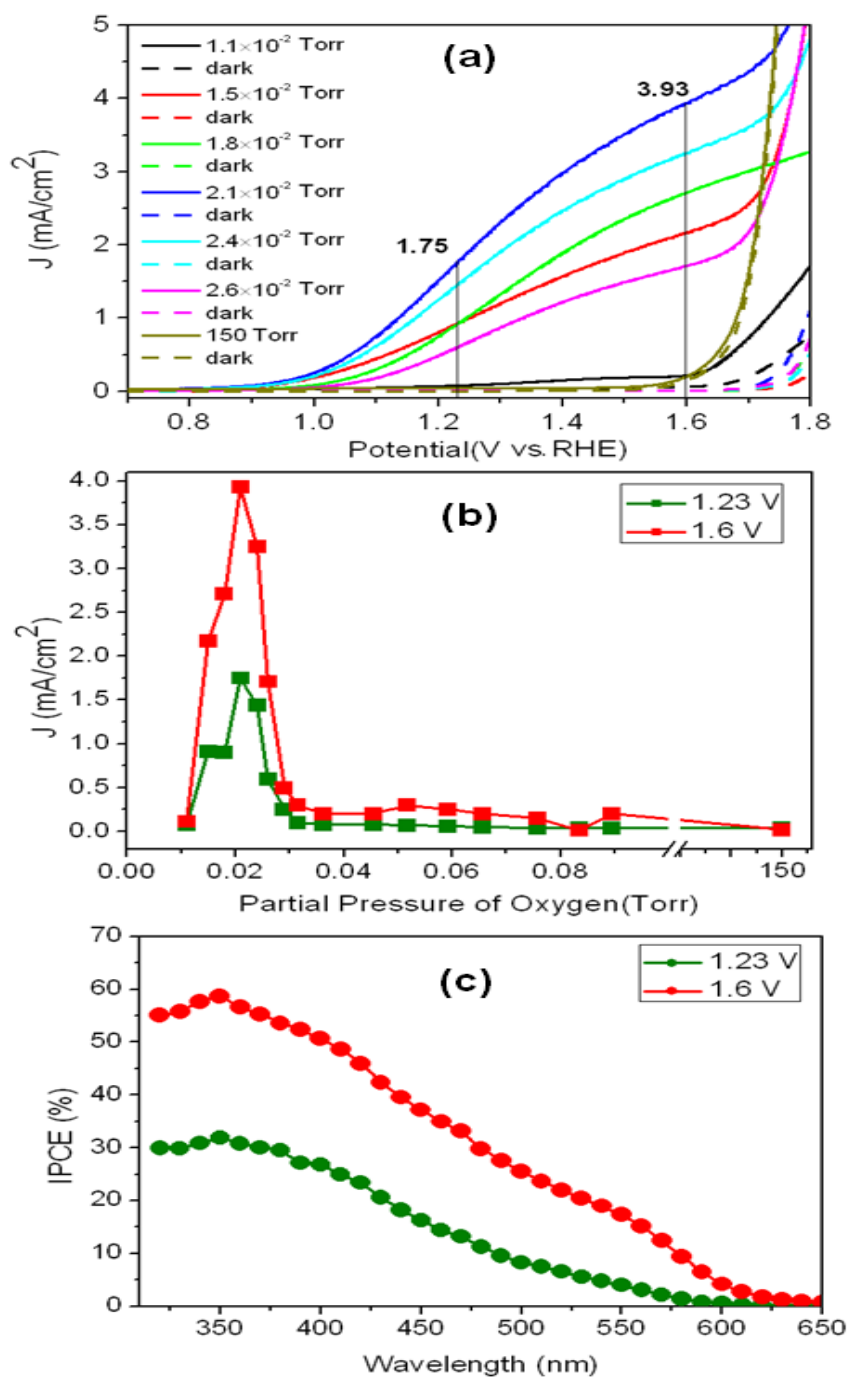

**Figure S5:** (a)  $J$ - $V$  scans for undoped hematite sintered in various partial oxygen pressures at 550 °C. (b) Photocurrent density of undoped hematite at 1.23 and 1.6 V vs. RHE as a function of partial oxygen pressure. (c) IPCE spectra for undoped hematite sintered in a partial oxygen pressure of  $2.1 \times 10^{-2}$  Torr at 1.23 (green) and 1.6 (red) V vs. RHE.

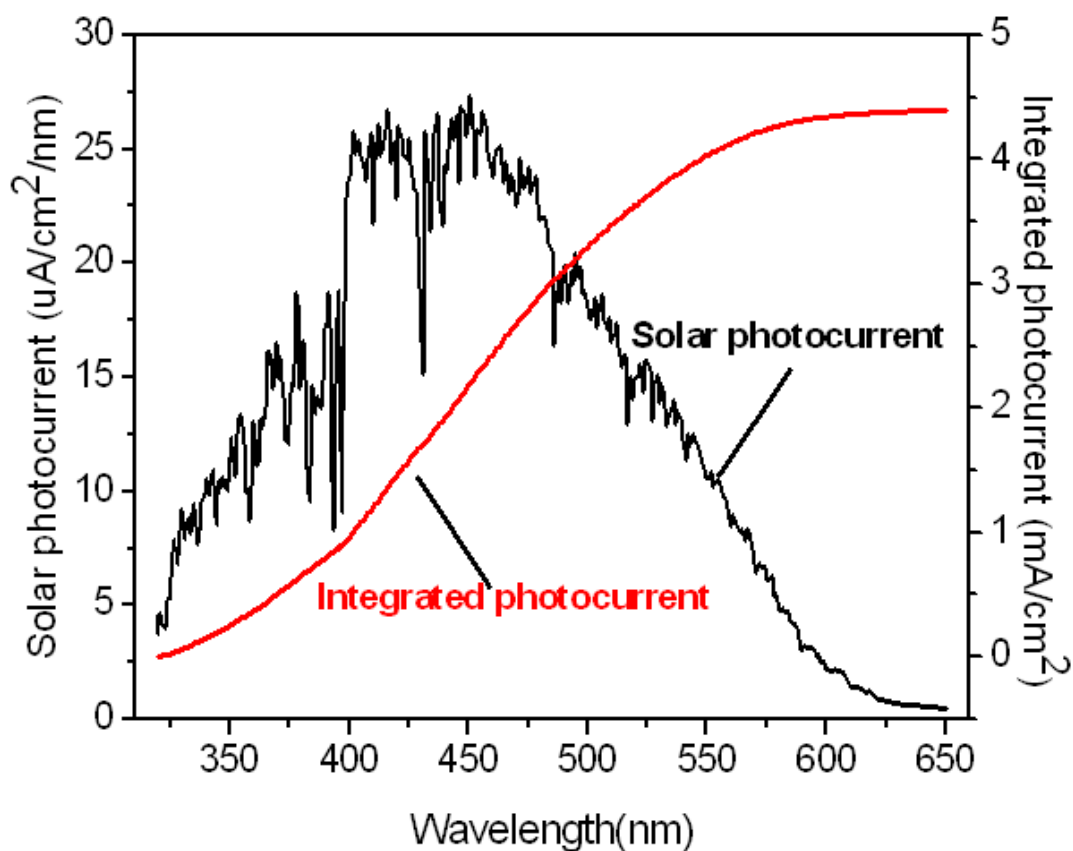

**Figure S6:** The integrated photocurrent based on the IPCE data (320 nm to 650nm) at 1.6 V vs. RHE. The photocurrent density was calculated by integrating the IPCE spectra with a standard AM 1.5G solar spectrum (ASTMG-173-03), using the following equation:

$$I = \int_{350}^{650} \frac{1}{1240} \lambda IPCE(\lambda) E(\lambda) d\lambda$$

where  $E(\lambda)$  is the solar spectral irradiance at a specific wavelength ( $\lambda$ ) and  $IPCE(\lambda)$  is the obtained IPCE profile as a function of wavelengths ( $\lambda$ ) at 1.6 V vs. RHE. The integrated photocurrent at 1.23 V vs. RHE was calculated by a similar way. The calculated photocurrents are 2.04 mA cm<sup>-2</sup> and 4.41 mA cm<sup>-2</sup> at 1.23 and 1.6 V vs. RHE, respectively.

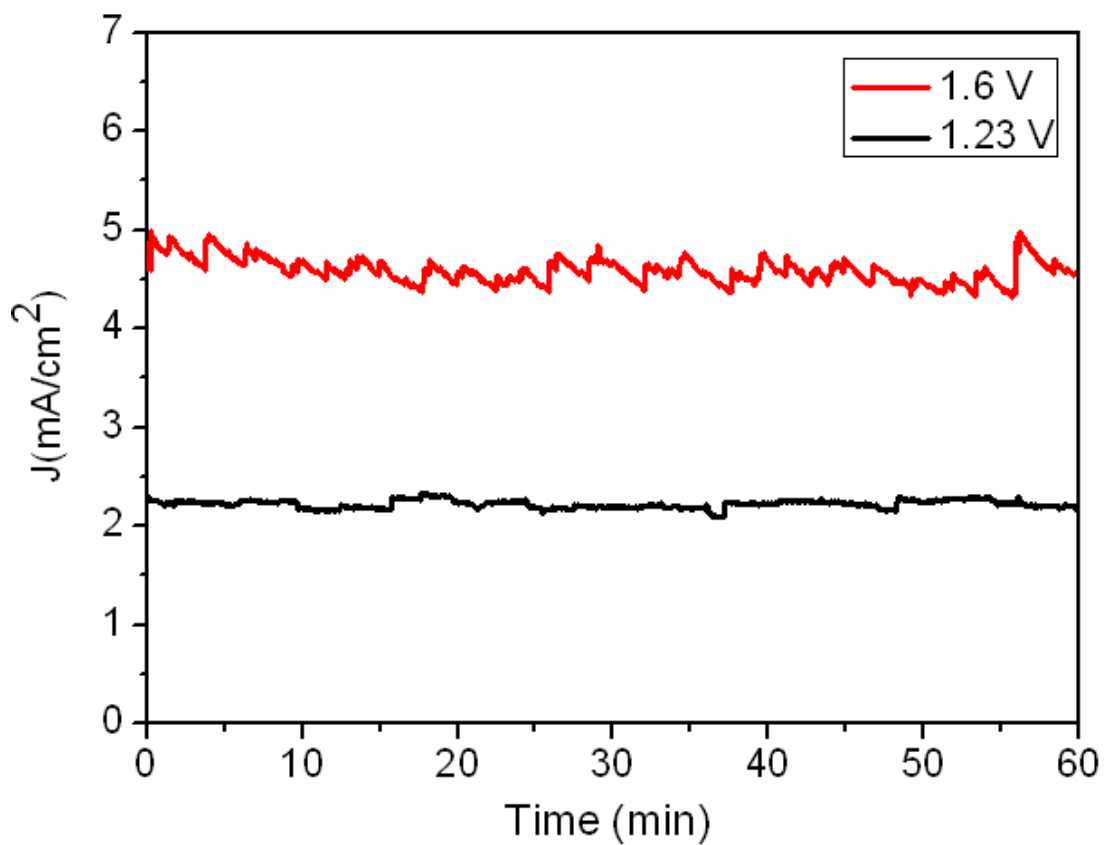

**Figure S7:** Photochemical stability curves for the Ti-doped sample ( $2.4 \times 10^{-2}$  Torr) collected at 1.23 V and 1.6 V vs. RHE.



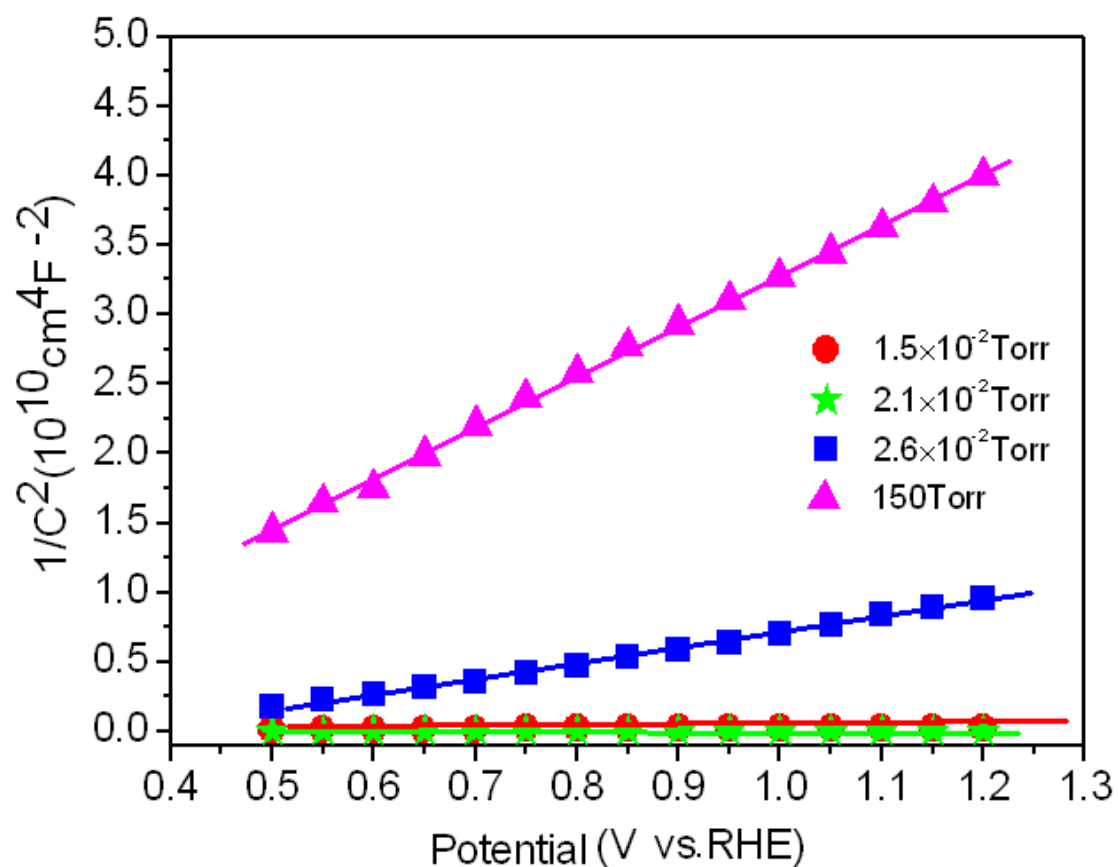

**Figure S8:** Mott-Schottky plots of undoped hematite samples sintered in various partial oxygen pressures at 550 °C. Results show that the best donor density of undoped hematite sample is  $3.73 \times 10^{20} \text{ cm}^{-3}$  at  $2.1 \times 10^{-2}$  Torr, while the donor densities of other samples are  $6.19 \times 10^{19} \text{ cm}^{-3}$  at  $1.5 \times 10^{-2}$  Torr,  $1.5 \times 10^{18} \text{ cm}^{-3}$  at  $2.6 \times 10^{-2}$  Torr and  $4.8 \times 10^{17} \text{ cm}^{-3}$  at 150 Torr.
